# Supplementary material for: The mediating role of sleep, physical activity, and diet in the association between shift work and respiratory infections
Source: Scand J Work Environ Health. 2020 Apr 7;46(5):516–24. doi: 10.5271/sjweh.3896 (PMC7737798; doi:10.5271/sjweh.3896)
Supplement: Supplementary material [file SJWEH-46-516-S001.pdf]

# The mediating role of sleep, physical activity, and diet in the association between shift work and respiratory infections <sup>1</sup>

by Bette Loef, MSc, Allard J van der Beek, PhD, Gerben Hulsege, PhD, Debbie van Baarle, PhD, Karin I Proper, PhD <sup>2</sup>

1. *Supplementary tables and figures*

2. *Correspondence to: Karin I Proper, PhD, Center for Nutrition, Prevention and Health Services, National Institute for Public Health and the Environment; P.O. Box 1, 3720 BA Bilthoven, The Netherlands. [E-mail: karin.proper@rivm.nl]*

**Table S1.** Path coefficients (untransformed odds ratios and incidence rate ratios) of sleep, physical activity, and diet on the association between shift work and ILI/ARI incidence rate (complete case analysis, n=396)<sup>a</sup>

|                                  | a-paths<br>(shift work -> mediator) |        |       | b-paths<br>(mediator -> ILI/ARI) |        |       | c'-path<br>(direct effect) |        |       | c-path<br>(total effect) |        |       |
|----------------------------------|-------------------------------------|--------|-------|----------------------------------|--------|-------|----------------------------|--------|-------|--------------------------|--------|-------|
|                                  |                                     |        |       |                                  |        |       |                            |        |       |                          |        |       |
|                                  | B                                   | 95%-CI |       | B                                | 95%-CI |       | B                          | 95%-CI |       | B                        | 95%-CI |       |
| Direct and total effect          |                                     |        |       |                                  |        |       | 0.138                      | -0.062 | 0.338 | 0.205 <sup>b</sup>       | 0.010  | 0.401 |
| Short sleep duration             | 1.042 <sup>b</sup>                  | 0.231  | 1.854 | 0.048                            | -0.098 | 0.195 |                            |        |       |                          |        |       |
| Long sleep duration              | 0.341                               | -0.258 | 0.941 | -0.027                           | -0.160 | 0.106 |                            |        |       |                          |        |       |
| Poor sleep quality               | 1.161 <sup>b</sup>                  | 0.242  | 2.081 | 0.220 <sup>b</sup>               | 0.053  | 0.388 |                            |        |       |                          |        |       |
| Physical activity during leisure | 0.028                               | -0.583 | 0.639 | 0.020                            | -0.115 | 0.154 |                            |        |       |                          |        |       |
| Physical activity at work        | 1.031 <sup>b</sup>                  | 0.387  | 1.675 | 0.064                            | -0.067 | 0.195 |                            |        |       |                          |        |       |
| Number of meals                  | -0.369                              | -1.149 | 0.410 | -0.028                           | -0.213 | 0.158 |                            |        |       |                          |        |       |
| Number of snacks                 | 0.369                               | -0.220 | 0.958 | 0.100                            | -0.030 | 0.229 |                            |        |       |                          |        |       |

ARI, acute respiratory illness; B, regression coefficient; CI, confidence interval; ILI, influenza-like illness.

<sup>a</sup> Adjusted for age, gender, occupation, influenza vaccination status, and general perceived health.

<sup>b</sup> p<0.05.

**Table S2.** Indirect effects of sleep, physical activity, and diet on the association between shift work and ILI/ARI incidence rate (imputed data analysis, n=589)<sup>a</sup>

|                                  | Indirect effects <sup>b</sup> |        |      |
|----------------------------------|-------------------------------|--------|------|
|                                  | IRR                           | 95%-CI |      |
| Short sleep duration             | 1.01                          | 0.88   | 1.17 |
| Long sleep duration              | 0.98                          | 0.93   | 1.02 |
| Poor sleep quality               | 1.33 <sup>c</sup>             | 1.07   | 1.91 |
| Physical activity during leisure | 1.00                          | 0.97   | 1.04 |
| Physical activity at work        | 1.06                          | 0.96   | 1.20 |
| Number of meals                  | 1.01                          | 0.95   | 1.09 |
| Number of snacks                 | 1.03                          | 0.99   | 1.11 |

ARI, acute respiratory illness; CI, confidence interval; ILI, influenza-like illness; IRR, incidence rate ratio.

<sup>a</sup> Adjusted for age, gender, occupation, influenza vaccination status, and general perceived health.

<sup>b</sup> Indirect effects are calculated by taking  $e$  (base of the natural logarithm) raised to the power of the product of the a-paths and b-paths (e.g.  $e^{(a1*b1)}=e^{(1.011*0.013)}=1.00$ ).

<sup>c</sup>  $p<0.05$ .

**Table S3.** Indirect effects of sleep, physical activity, and diet on the association between shift work and ILI/ARI incidence rate with a 30-day time-lag between measurements of mediators and outcome (complete case analysis, n=396)<sup>a</sup>

|                                  | Indirect effects <sup>b</sup> |        |      |
|----------------------------------|-------------------------------|--------|------|
|                                  | IRR                           | 95%-CI |      |
| Short sleep duration             | 1.05                          | 0.86   | 1.34 |
| Long sleep duration              | 1.00                          | 0.92   | 1.07 |
| Poor sleep quality               | 1.30 <sup>c</sup>             | 1.01   | 2.04 |
| Physical activity during leisure | 1.00                          | 0.93   | 1.08 |
| Physical activity at work        | 1.10                          | 0.94   | 1.36 |
| Number of meals                  | 1.01                          | 0.89   | 1.15 |
| Number of snacks                 | 1.03                          | 0.96   | 1.14 |

ARI, acute respiratory illness; CI, confidence interval; ILI, influenza-like illness; IRR, incidence rate ratio.

<sup>a</sup> Adjusted for age, gender, occupation, influenza vaccination status, and general perceived health.

<sup>b</sup> Indirect effects are calculated by taking  $e$  (base of the natural logarithm) raised to the power of the product of the a-paths and b-paths (e.g.  $e^{(a1*b1)}=e^{(1.042*0.050)}=1.05$ ).

<sup>c</sup>  $p<0.05$ .

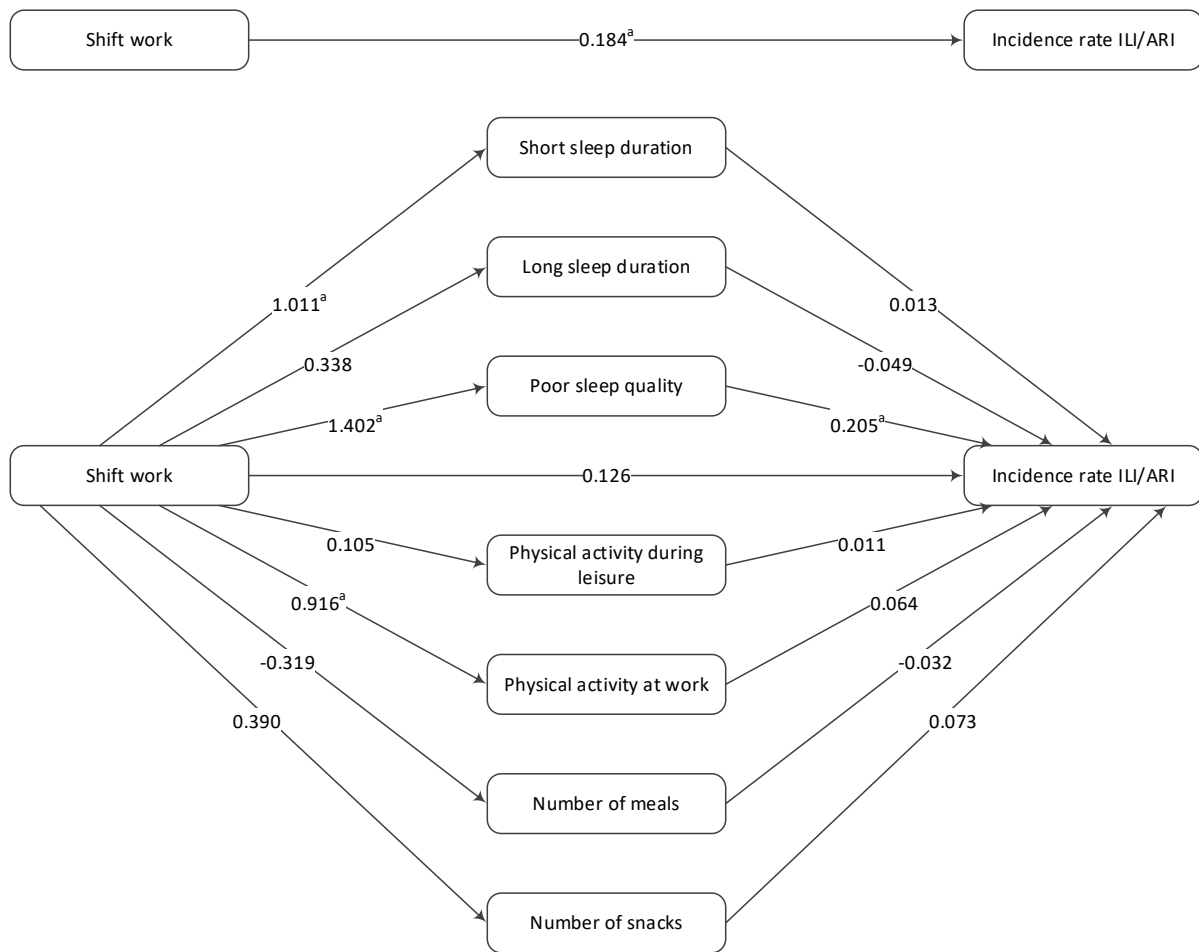

**Figure S1. Multiple mediation model of the total effect of shift work on influenza-like illness/acute respiratory infection (ILI/ARI) incidence rate, the indirect effects of sleep, physical activity, and diet, and the direct effect of shift work on ILI/ARI incidence rate (imputed data analysis, n=589).** The values in the paths to the potential mediators represent untransformed coefficients from logistic regression analysis, and the values in the paths to incidence rate ILI/ARI represent untransformed coefficients from negative binomial regression analysis. Coefficients are adjusted for age, gender, occupation, influenza vaccination status, and general perceived health. <sup>a</sup> p<0.05.

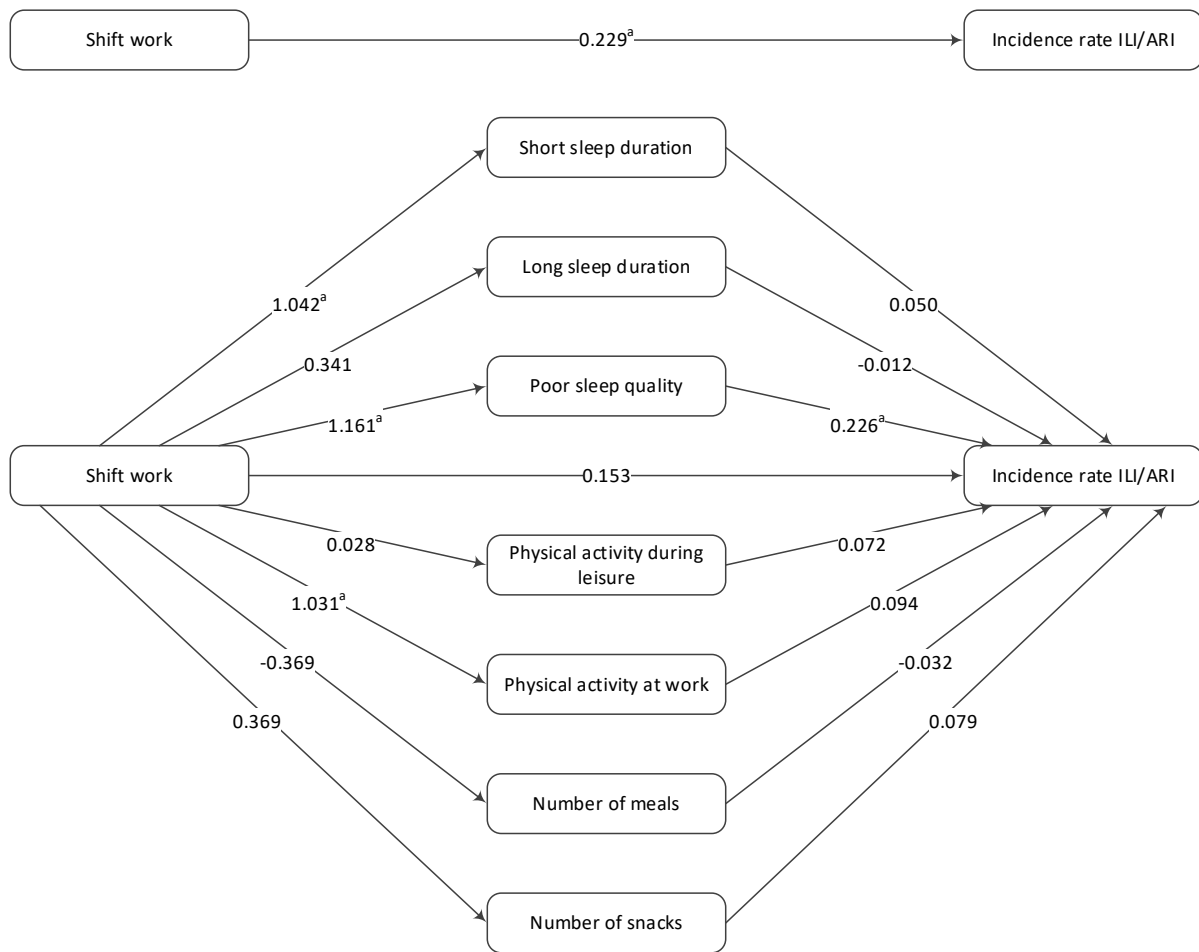

**Figure S2. Multiple mediation model of the total effect of shift work on influenza-like illness/acute respiratory infection (ILI/ARI) incidence rate, the indirect effects of sleep, physical activity, and diet, and the direct effect of shift work on ILI/ARI incidence rate, with a 30-day time-lag between measurements of mediators and outcome (complete case analysis, n=396).** The values in the paths to the potential mediators represent untransformed coefficients from logistic regression analysis, and the values in the paths to incidence rate ILI/ARI represent untransformed coefficients from negative binomial regression analysis. Coefficients are adjusted for age, gender, occupation, influenza vaccination status, and general perceived health. <sup>a</sup> p<0.05.
